# Supplementary material for: KMnCuTe2: a layered antiferromagnetic semiconductor with long metal–metal distance
Source: Royal Society of Chemistry journal article supplement (doi:10.1039/d2ra04789f), 2022-01-01
Supplement: d2ra04789f1.pdf [file d2ra04789f1.pdf]

## Supplementary Information

### **KMnCuTe<sub>2</sub>: a layered antiferromagnetic semiconductor with long metal-metal distance**

Fan Sun,<sup>a</sup> Zhao Liu,<sup>a</sup> Jiawei Lin,<sup>a</sup> Jun Deng,<sup>b</sup> Zhongnan Guo,<sup>a\*</sup> and Wenxia Yuan <sup>a\*\*</sup>

<sup>a</sup> *Department of Chemistry, School of Chemistry and Biological Engineering, University of Science and Technology Beijing, Beijing 100083, China.*

*E-mail : [guozhongn@ustb.edu.cn](mailto:guozhongn@ustb.edu.cn) [wxyuanwz@163.com](mailto:wxyuanwz@163.com);*

*Fax: +86-010-62333033; [Tel: +86-010-62332221](tel:+86-010-62332221)*

<sup>b</sup> *Research & Development Center for Functional Crystals, Beijing National Laboratory for Condensed Matter Physics, Institute of Physics, Chinese Academy of Sciences, Beijing 100190, China.*

Table S1. Crystal data and structure refinement for KMnCuTe<sub>2</sub> at 293 K.

|                                |                                                        |
|--------------------------------|--------------------------------------------------------|
| Empirical formula              | KMn <sub>1.04</sub> Cu <sub>0.96</sub> Te <sub>2</sub> |
| Formula weight                 | 412.52                                                 |
| Temperature                    | 293(2) K                                               |
| Wavelength                     | 0.71073 Å                                              |
| Crystal system                 | tetragonal                                             |
| Space group                    | <i>I4/mmm</i>                                          |
| Unit cell dimensions           | $a = 4.3115(3)$ Å<br>$c = 14.9360(20)$ Å               |
| Volume                         | 277.64(10) Å <sup>3</sup>                              |
| Z                              | 2                                                      |
| Density (calculated)           | 4.935 g/cm <sup>3</sup>                                |
| Absorption coefficient         | 16.932 mm <sup>-1</sup>                                |
| F(000)                         | 354                                                    |
| Crystal size                   | 0.4 × 0.3 × 0.05 mm <sup>3</sup>                       |
| θ range for data collection    | 2.73 to 27.95°                                         |
| Index ranges                   | -5 ≤ h ≤ 5, -5 ≤ k ≤ 5, -19 ≤ l ≤ 19                   |
| Reflections collected          | 1097                                                   |
| Independent reflections        | 130 [R <sub>int</sub> = 0.0389]                        |
| Completeness to θ = 25.242°    | 99%                                                    |
| Refinement method              | Full-matrix least-squares on F <sup>2</sup>            |
| Data / restraints / parameters | 130 / 0 / 9                                            |
| Goodness-of-fit                | 1.57                                                   |
| Final R indices [I > 2σ(I)]    | R <sub>obs</sub> = 0.0202, wR <sub>obs</sub> = 0.0477  |
| R indices [all data]           | R <sub>all</sub> = 0.0206, wR <sub>all</sub> = 0.0478  |
| Largest diff. peak and hole    | 1.15 and -0.46 e·Å <sup>-3</sup>                       |

$$R = \frac{\sum ||F_o| - |F_c||}{\sum |F_o|}, wR = \left\{ \frac{\sum [w(|F_o|^2 - |F_c|^2)^2]}{\sum [w(|F_o|^4)]} \right\}^{1/2} \text{ and } w = 1 / [\sigma^2(F_o^2) + (0.0317P)^2] \text{ where } P = (F_o^2 + 2F_c^2) / 3$$

Table S2. Atomic coordinates ( $\times 10^4$ ) and equivalent isotropic displacement parameters

( $\text{\AA}^2 \times 10^3$ ) for  $\text{KMnCuTe}_2$  at 293 K with estimated standard deviations in parentheses.

| Label | x | y    | z       | Occupancy | $U_{\text{eq}}^*$ |
|-------|---|------|---------|-----------|-------------------|
| K(1)  | 0 | 0    | 0       | 1         | 33(1)             |
| Te(1) | 0 | 0    | 3605(1) | 1         | 19(1)             |
| Mn(1) | 0 | 5000 | 2500    | 0.52(3)   | 25(1)             |
| Cu(1) | 0 | 5000 | 2500    | 0.48(3)   | 25(1)             |

\* $U_{\text{eq}}$  is defined as one third of the trace of the orthogonalized  $U_{ij}$  tensor.

Table S3. Anisotropic displacement parameters ( $\text{\AA}^2 \times 10^3$ ) for  $\text{KMnCuTe}_2$  at 293 K with estimated standard deviations in parentheses.

| Label | $U_{11}$ | $U_{22}$ | $U_{33}$ | $U_{12}$ | $U_{13}$ | $U_{23}$ |
|-------|----------|----------|----------|----------|----------|----------|
| K(1)  | 30(2)    | 30(2)    | 38(2)    | 0        | 0        | 0        |
| Te(1) | 19(1)    | 19(1)    | 20(1)    | 0        | 0        | 0        |
| Mn(1) | 23(1)    | 23(1)    | 30(1)    | 0        | 0        | 0        |
| Cu(1) | 23(1)    | 23(1)    | 30(1)    | 0        | 0        | 0        |

The anisotropic displacement factor exponent takes the form:  $-2\pi^2[h^2a^*U_{11} + \dots + 2hka^*b^*U_{12}]$ .

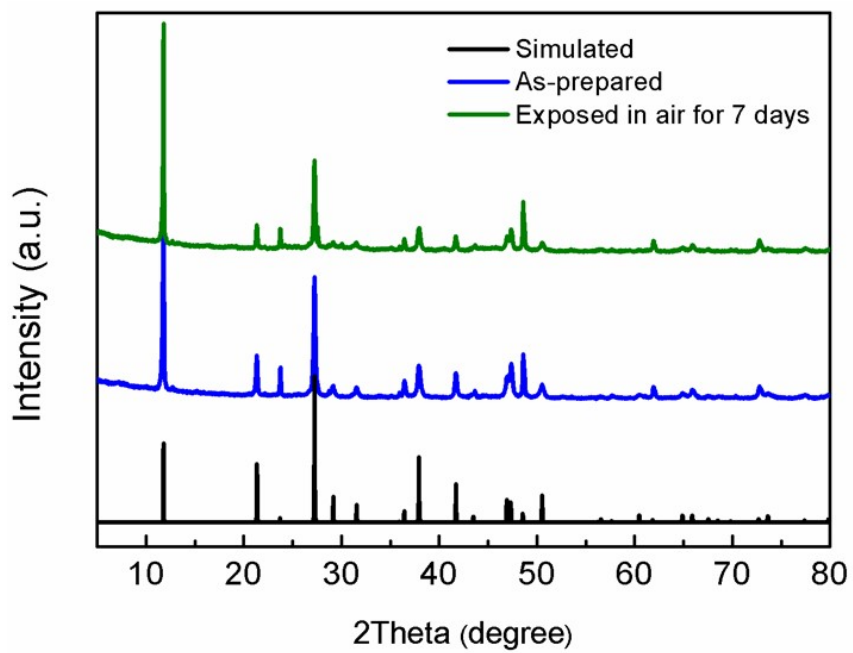

**Fig. S1** PXRD patterns of the  $\text{KMnCuTe}_2$  powder sample compared with the simulated one from SCXRD.
